# Supplementary material for: Radial spoke protein 9 is necessary for axoneme assembly in Plasmodium but not in trypanosomatid parasites
Source: PubMed Central journal article supplement (PMC10309588; doi:10.1242/jcs.260655), 2023-06-08
Supplement: joces-136-260655-s1.pdf [file joces-136-260655-s1.pdf]

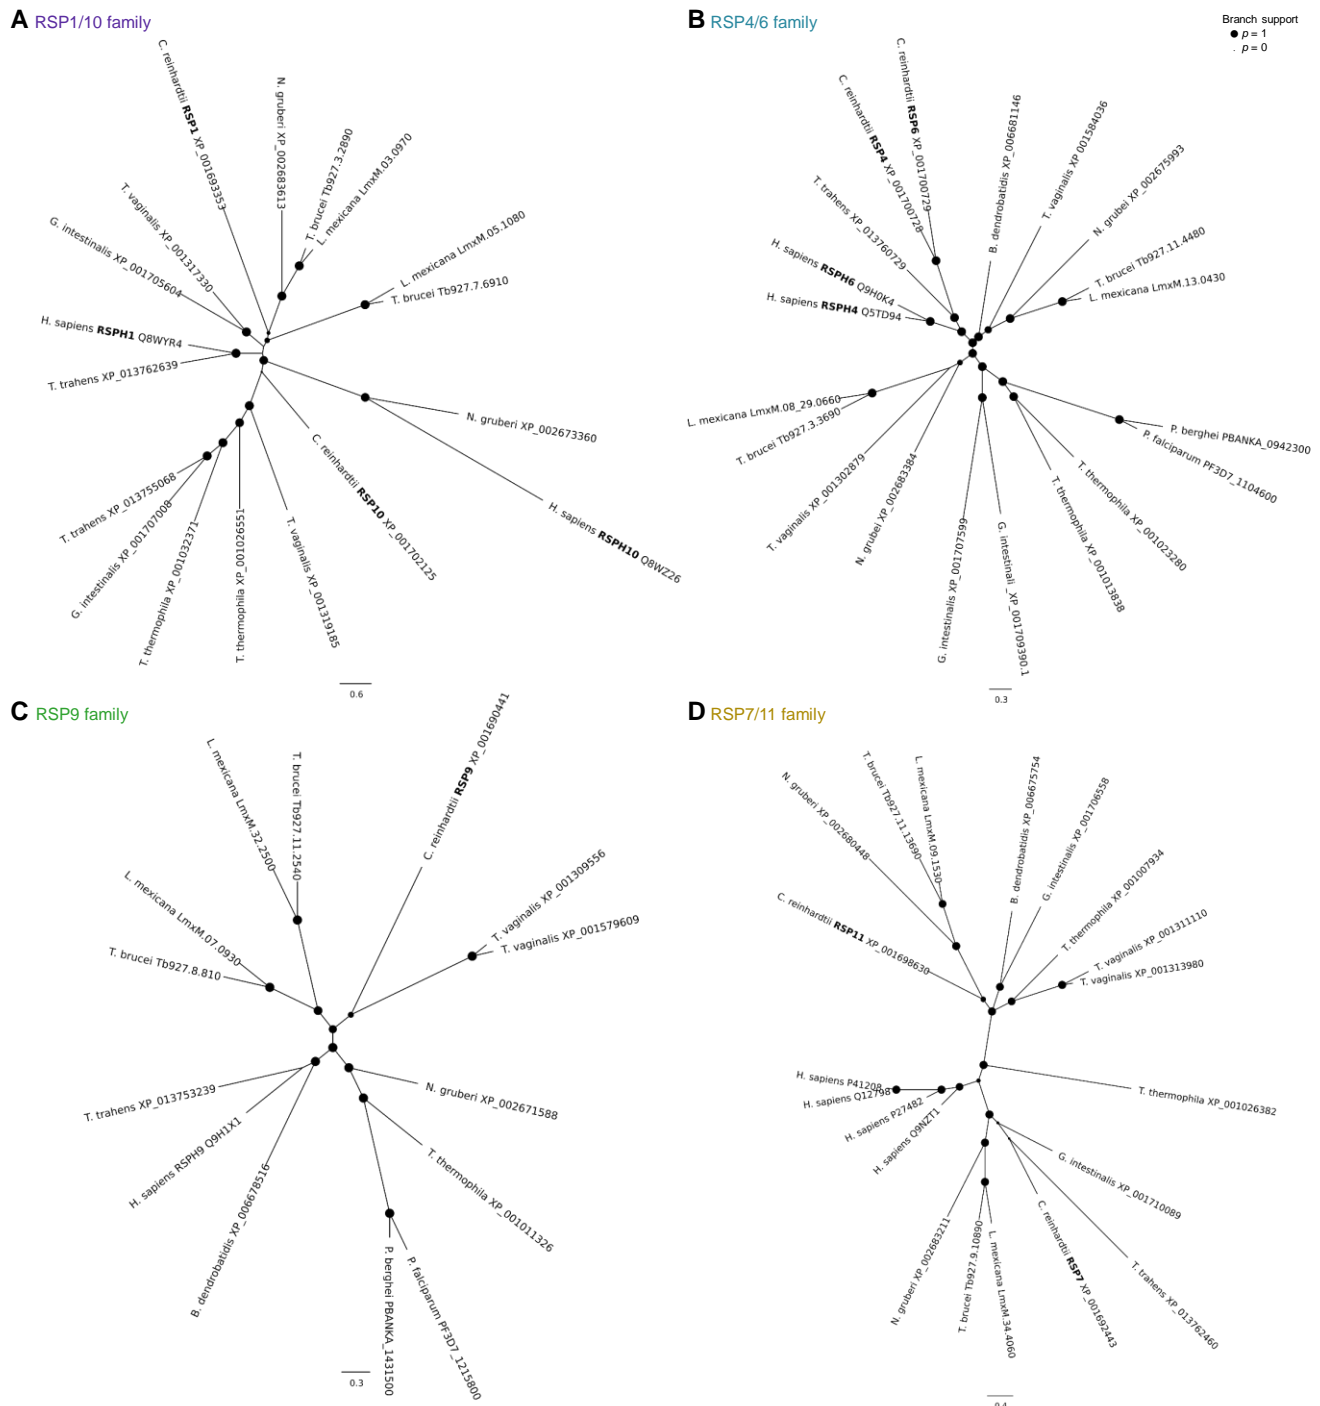

**Fig. S1. Phylogenetic trees of the RSP1/10, RSP4/6, RSP9 and RSP7/11 families**  
 Maximum likelihood phylogenetic trees constructed for *Batrachochytrium dendrobatidis*, *Chlamydomonas reinhardtii*, *Giardia intestinalis*, *Homo sapiens*, *Leishmania mexicana*, *Naegleria gruberi*, *Plasmodium berghei*, *Plasmodium falciparum*, *Tetrahymena thermophila*, *Thecamonas trahens*, *Trichomonas vaginalis* and *Trypanosoma brucei* orthologs of **A.** RSP1/10, **B.** RSP4/6, **C.** RSP9 and **D.** RSP7/11 families of RSPs. Leaf labels show species, accession number and, for *C. reinhardtii* and *H. sapiens*, gene names. Circles at the branch nodes indicate  $\chi^2$  approximate likelihood ratio test p values.

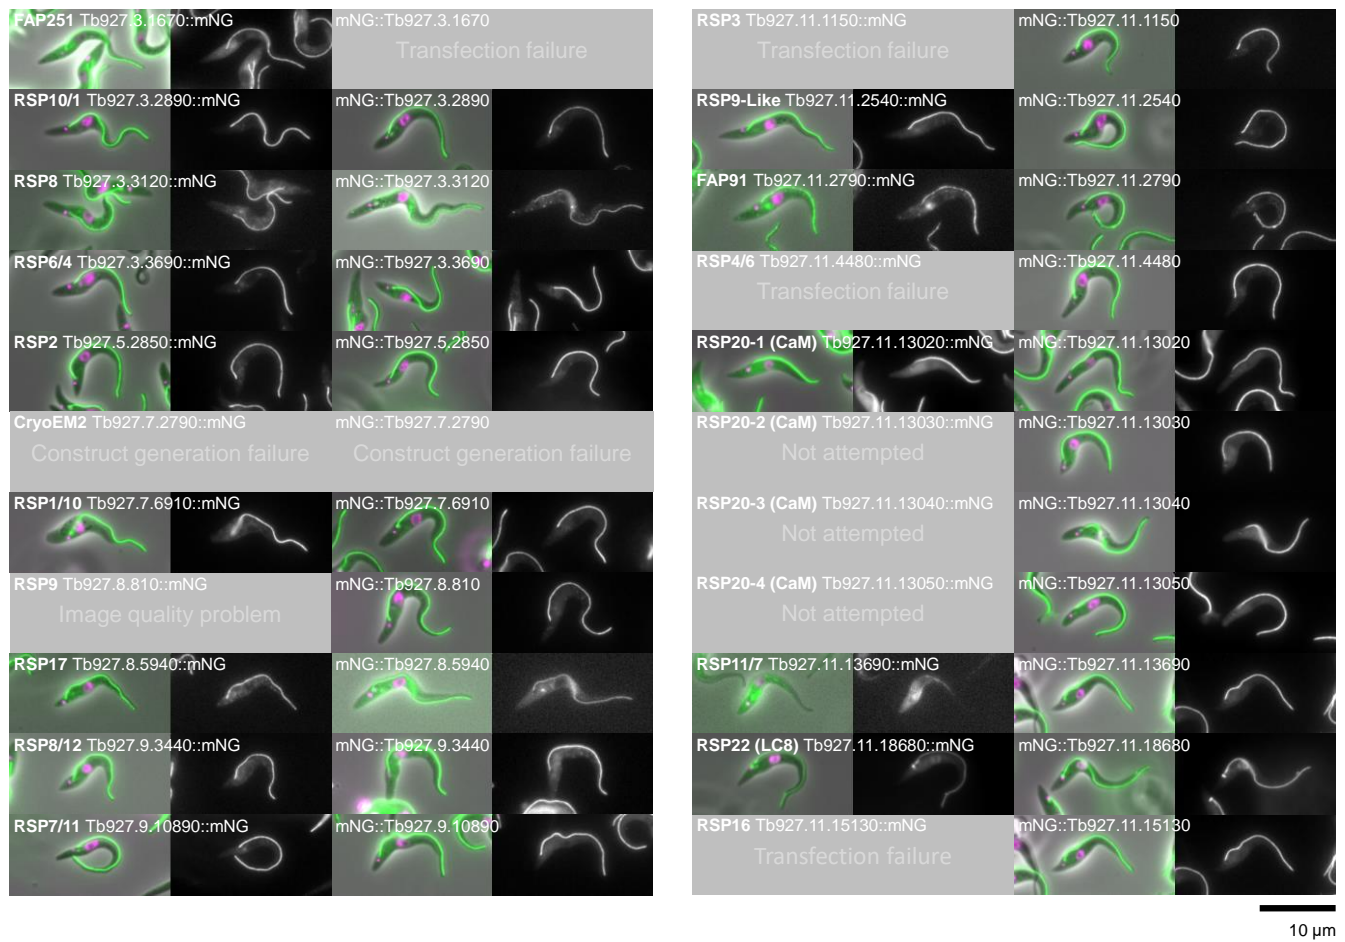

**Fig. S2. Localisation of RSP candidates in *T. brucei* from a genome-wide protein localisation project** Fluorescence micrographs of the sub-cellular localisation of RSP candidates as determined by N (left column) or C terminal tagging (right column) by the genome wide protein localisation project TrypTag (Dean *et al.*, 2017). Combined phase contrast (grey), Hoechst 33342 (DNA stain, magenta) and mNG tagging (green) respectively are shown.

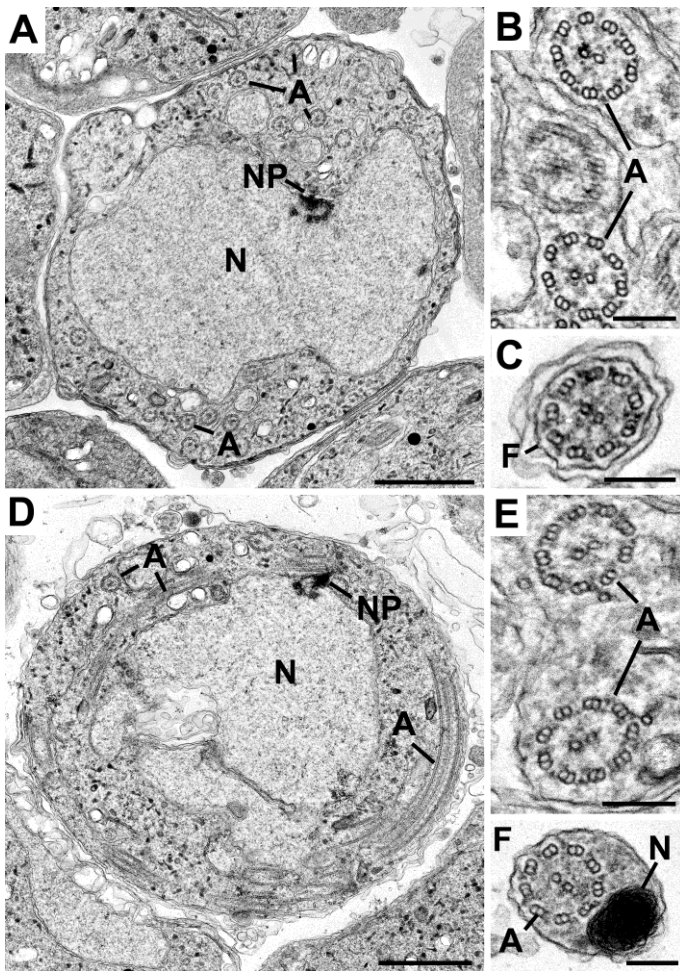

**Fig. S3. Electron micrographs of sections illustrating microgametocytes of wild type and  $\Delta$ *rsp11* mutants.** Wild type: (A-C),  $\Delta$ *rsp11* (D-F). **A.** Low power image through a microgametocyte showing the central nucleus (N) with a nuclear pole (NP) and the cytoplasm containing a number of axonemes (A). **B.** Detail from the cytoplasm of a mid-stage microgametocyte showing axonemes (A) with the normal 9+2 organisation. **C.** Detail of a cross section free flagellum (F) with a 9+2 axoneme. **D.** Low power of mutant microgametocyte showing the large central nucleus (N) with a nuclear pole (NP) with a number of axonemes (A) in the cytoplasm. **E.** Detail from the cytoplasm showing two cross-section axonemes with the normal 9+2 organisation. **F.** Cross section through a microgamete showing the nucleus (N) and 9+2 axoneme (A). Bars represent 1  $\mu$ m (A and D) and 100 nm (B, C and E, F).

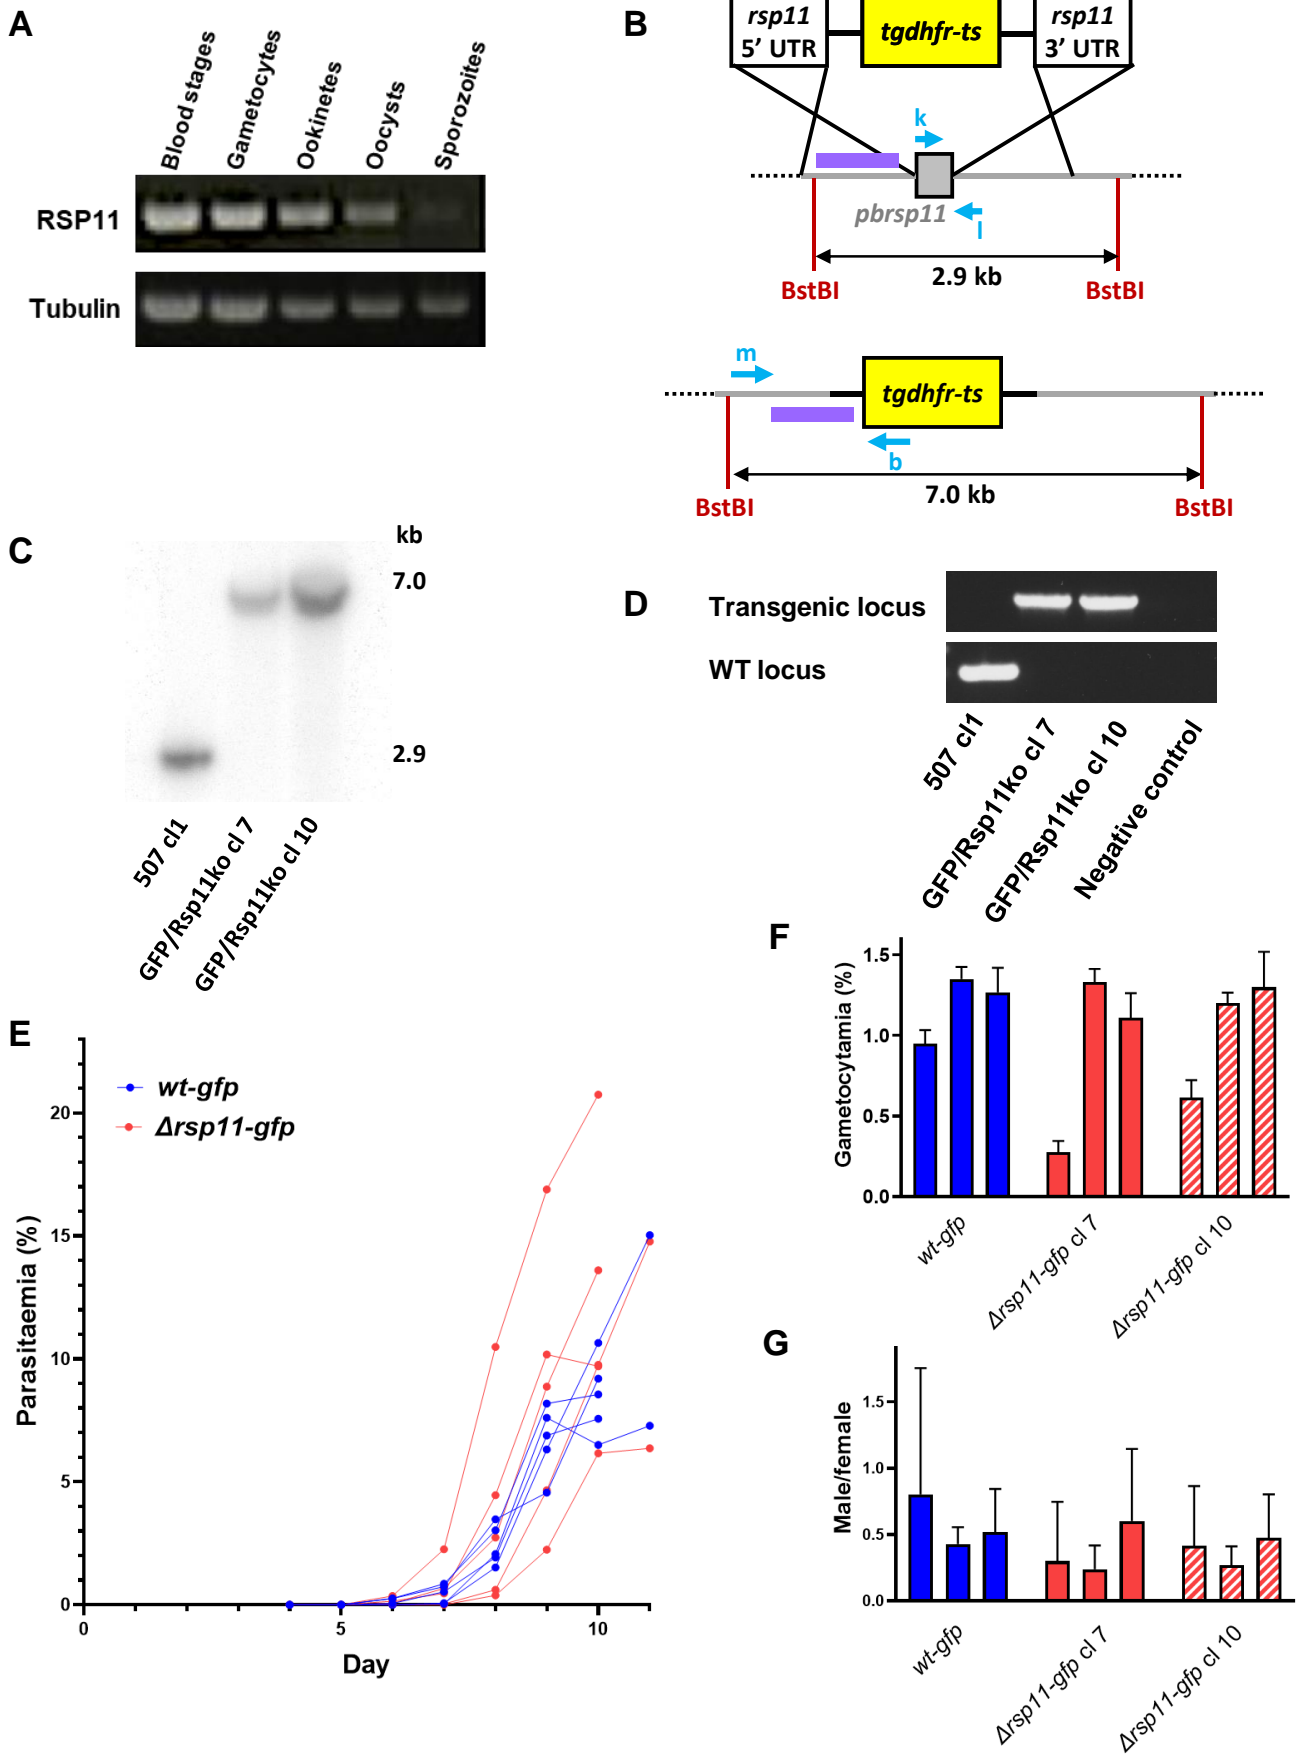

H

|                               | 15 min                         |                                                 | 20 min                         |                                                 |
|-------------------------------|--------------------------------|-------------------------------------------------|--------------------------------|-------------------------------------------------|
|                               | Exflagellating gametocytes (%) | Released flagella/exflagellating gametocyte (%) | Exflagellating gametocytes (%) | Released flagella/exflagellating gametocyte (%) |
| <i>wt-gfp</i>                 | 54.51                          | 11.72                                           | 66.23                          | 24.50                                           |
| $\Delta$ <i>rsp11-gfp</i> cl7 | 41.64                          | 1.52                                            | 48.52                          | 4.35                                            |

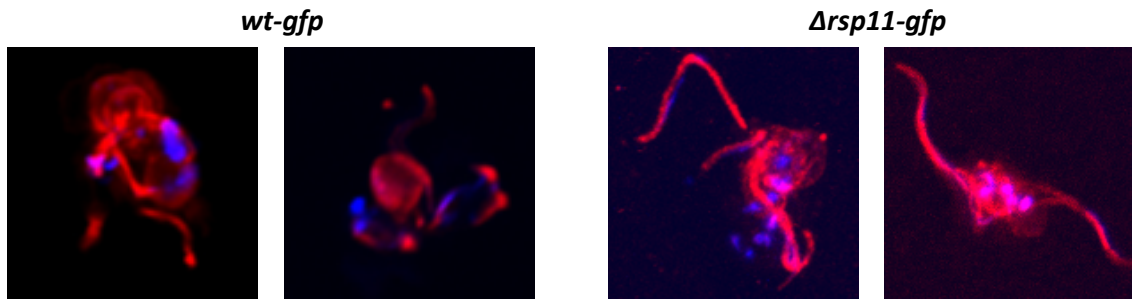

I

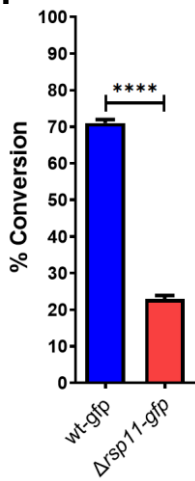

J

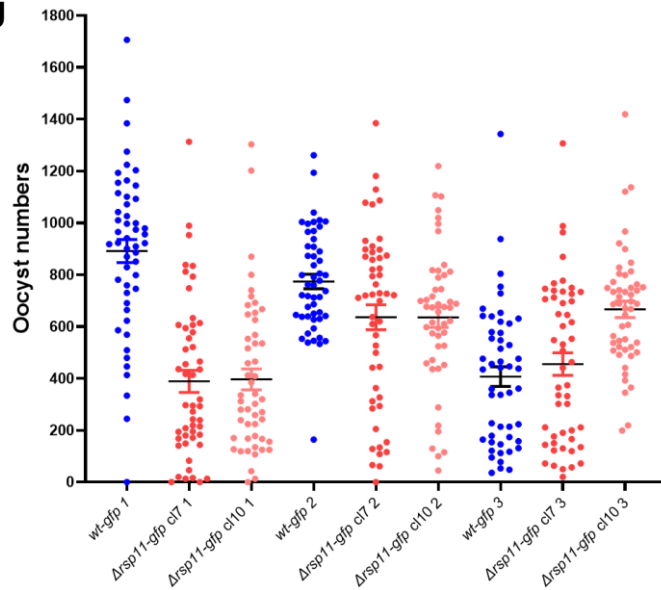

K

| Strain                         | Mice infected |
|--------------------------------|---------------|
| $\Delta$ <i>rsp11-gfp</i> cl7  | 4/4           |
| $\Delta$ <i>rsp11-gfp</i> cl10 | 4/4           |
| <i>wt-gfp</i>                  | 4/4           |

**Fig. S4. PBANKA\_112580 predicted to be RSP11 is not a *Plasmodium* flagellar protein**

**A.** *Pbrsp11* RT-PCR analysis of mixed blood stages, gametocytes, ookinetes, oocysts and sporozoites. PCR using the constitutively expressed *tubulin* gene served as control for RNA/cDNA quality. **B.** Homologous recombination of the *Toxoplasma gondii* dihydrofolate reductase thymidylate synthase (*Tgdhfr-ts*) gene into the *P. berghei* *rsp9* locus resulting in gene deletion. The Southern blot probe is illustrated as purple bar. **C.** Analysis of mutant locus in transgenic lines after plasmid integration by Southern blot. Restriction digestion of genomic DNA with BstBI produces fragments of different sizes for  $\Delta$ *rsp9-gfp* (7 kb) and *wt-gfp* (2.9kb). The Southern probe was generated by amplification of the 5' UTR region. **D.** Diagnostic PCRs of  $\Delta$ *rsp9-gfp* and *wt-gfp* parasites. Primer positions are illustrated in figures **B**. **E.** Asexual growth of  $\Delta$ *rsp11-gfp* clones and *wt-gfp* recorded from onset of parasitaemia. **F.** Gametocytaemia and **(G)** gametocyte sex ratio were determined by infections of 3 mice each infected with  $\Delta$ *rsp11-gfp* or *wt-gfp*. Error bars represent standard errors of the means. **H.** Assessment of exflagellation and gamete release rate of  $\Delta$ *rsp11-gfp* compared to *wt-gfp*. Anti- $\alpha$ -tubulin staining of exflagellating *wt-gfp* and  $\Delta$ *rsp11-gfp* male gametocytes illustrates exflagellation processes similar to wildtype in  $\Delta$ *rsp11-gfp*. Anti-tubulin is visualized in red with DAPI as nuclear counter stain. **I.** Ookinete conversion rate of  $\Delta$ *rsp11-gfp* clones and *wt-gfp*. Error bars represent standard error of the mean (SEM). Asterisks represent a p-value < 0.0001 determined by Welch's t-test. **J.** Number of oocysts  $\Delta$ *rsp11-gfp* clones in mosquito midguts compared to *wt-gfp*. Bars depict mean with SEM. **K.** Infection of C57Bl/6 mice with mosquitoes infected with  $\Delta$ *rsp11-gfp* clones and *wt-gfp* result in blood stage parasitaemia in all mice at day 6 post infection.

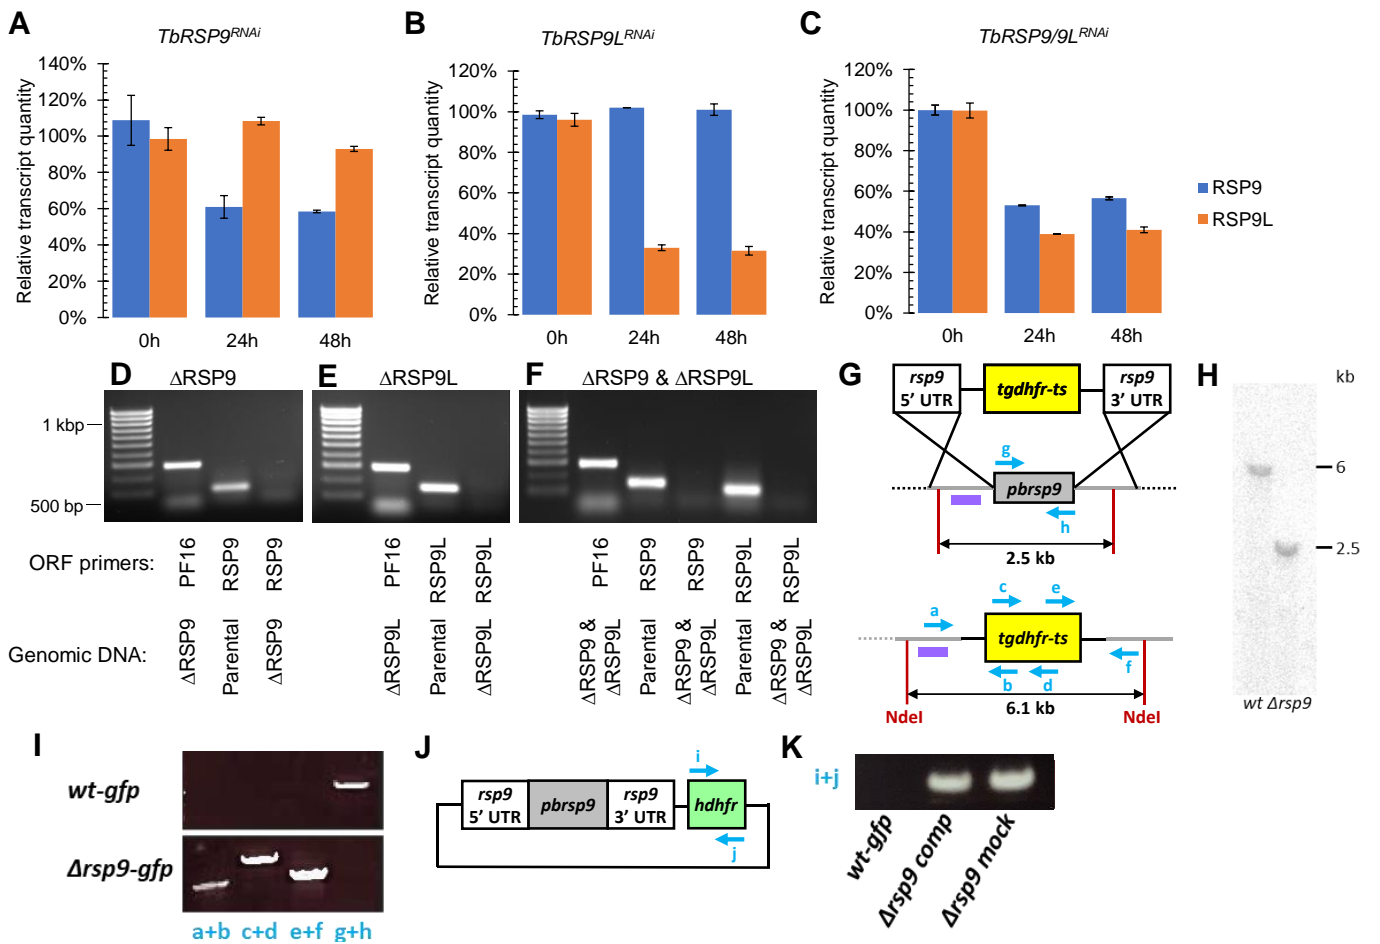

**Fig. S5. Validation of RSP9 mutants**

**A-C.** Diagnostic qRT-PCR to determine the knockdown of TbRSP9 and TbRSP9L in the **A.** *TbRSP9<sup>RNAi</sup>*, **B.** *TbRSP9L<sup>RNAi</sup>* and **C.** *TbRSP9 & RSP9L<sup>RNAi</sup>* *T. brucei* cell lines. For each, the relative transcript quantity at 0, 24 and 48 h following induction are shown. Error bars represent the standard deviation of  $n = 3$  technical replicates. **D-F.** Diagnostic PCRs to confirm deletion of both alleles of **D.** *LmxRSP9*, **E.** *LmxRSP9-Like* and **F.** both *LmxRSP9* and *LmxRSP9-like* in the clonal *L. mexicana* deletion cell lines. For each, gel electrophoresis of PCR products from genomic DNA (gDNA) are shown. Control PCR products from an unaffected open reading frame (ORF), PF16, are shown to confirm presence of deletion mutant gDNA and PCR products from parental gDNA are shown to confirm that the test primers can amplify the RSP9/RSP9-like ORF. **G.** Homologous recombination of the *Toxoplasma gondii* dihydrofolate reductase thymidylate synthase (*Tgdhfr-ts*) gene into the *P. berghei* *rsp9* locus resulting in gene deletion. Arrows represent primers used for diagnostic PCR; the Southern blot probe is illustrated as purple bar. **H.** Analysis of mutant locus in transgenic lines after plasmid integration by Southern blot. Restriction digestion of genomic DNA with NdeI produces fragments of different sizes for  $\Delta$ rsp9-gfp (6 kb) and wt-gfp (2.5 kb). The Southern blot probe was generated by amplification of the 5' UTR region. **I.** Diagnostic PCRs of  $\Delta$ rsp9-gfp and wt-gfp parasites. Primer positions are illustrated in figures **G.** **J.** Scheme of the plasmid used to transiently express *rsp9* to complement the knock-out phenotype. The *hdhfr* gene confers resistant to WR99210. Arrows illustrate primers used for diagnostic PCRs. **K.** Diagnostic PCRs of  $\Delta$ rsp9-gfp-rescue parasites compared to the mock transfected  $\Delta$ rsp9-gfp. Primer positions are illustrated in panel **J.**

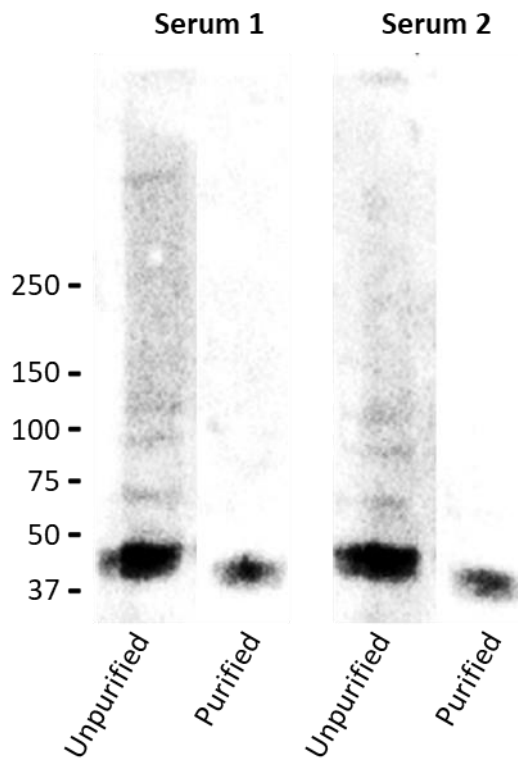

**Fig. S6. Validation of PfRSP9 anti-sera**

Western blot analysis of activated *P.falciparum* mixed gametocytes separated by native PAGE. Sera and affinity-purified immunoglobulins using coupled peptides have been tested and shown to recognize a single band at 43 kDa corresponding to the expected molecular weight.

**Table S1. Orthologs of *Chlamydomonas reinhardtii* RSPs in *P. falciparum*, *P. berghei*, *T. brucei* and *L. mexicana***

[Click here to download Table S1](#)

**Table S2. Gene IDs and primer sequences**

[Click here to download Table S2](#)

**Table S3. Amplicon length, qPCR efficiencies and  $r^2$  of calibration curve for *T. brucei* RSP9**

| Gene   | Description                               | Amplicon length | qPCR Efficiency | $r^2$  |
|--------|-------------------------------------------|-----------------|-----------------|--------|
| Actin  | Actin A                                   | 147bp           | 97.4%           | 0.9994 |
| Aldo   | Fructose-bisphosphate aldolase glycosomal | 86bp            | 97.8%           | 0.9997 |
| MRE11  | DNA Repair protein                        | 111bp           | 100.8%          | 0.9981 |
| ODA7   | Outer row dynein-assembly protein 7       | 118bp           | 100.7%          | 0.9993 |
| RSP9   | Radial spoke protein RSP9                 | 85bp            | 93.7%           | 0.9980 |
| RSP9-L | Radial spoke protein RSP9-Like            | 90bp            | 96.3%           | 0.9979 |
| TERT   | Telomerase reverse transcriptase          | 109bp           | 92.4%           | 0.9971 |

**Table S4. Prevalence and number of mosquitoes, average oocysts per mosquitoes and number of mosquitoes observed**

| Strain           | Experiment | Mosquitoes fed | Mouse infected | Sporozoite load per mosquito (n) |
|------------------|------------|----------------|----------------|----------------------------------|
| <i>Δrsp9-gfp</i> | 1          | 33             | Yes            | 1736 (53)                        |
| <i>Δrsp9-gfp</i> | 2          | 19             | Yes            | 17 (30)                          |
| <i>Δrsp9-gfp</i> | 3          | 31             | Yes            | 29'575 (31)                      |
| <i>wt-gfp</i>    | 4          | 5              | Yes            | 911 (10)                         |
| <i>wt-gfp</i>    | 5          | 6              | Yes            | 206 (10)                         |
| <i>wt-gfp</i>    | 6          | 5              | Yes            | 25'575 (8)                       |

**Table S5. Number of *Δrsp9-gfp* oocysts in mosquito midguts compared to infections with *wt-gfp*.**

| Strain           | Experiment | Number of mosquitoes | Average number of oocysts | Prevalence (%) |
|------------------|------------|----------------------|---------------------------|----------------|
| <i>Δrsp9-gfp</i> | 1          | 49                   | 38                        | 79             |
| <i>Δrsp9-gfp</i> | 2          | 35                   | 13                        | 44             |
| <i>Δrsp9-gfp</i> | 3          | 63                   | 32                        | 35             |
| <i>wt-gfp</i>    | 1          | 50                   | 582                       | 92             |
| <i>wt-gfp</i>    | 2          | 50                   | 748                       | 95             |
| <i>wt-gfp</i>    | 3          | 26                   | 679                       | 72             |
